# Supplementary material
Source: HighWire-hosted journal article supplement (https://erj.ersjournals.com/content/57/1/2003263)
Supplement: inline-supplementary-material-1 [file inline-supplementary-material-1.pdf]

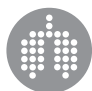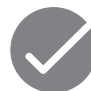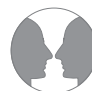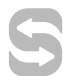

SHAREABLE PDF

# Caution in interpretation of abnormal carbon monoxide diffusion capacity in COVID-19 patients

David G. Chapman<sup>1,2</sup>, Tanya Badal<sup>1,3</sup>, Gregory G. King<sup>1,4,5,6</sup> and Cindy Thamrin<sup>1,6</sup>

**Affiliations:** <sup>1</sup>Airway Physiology and Imaging Group and Woolcock Emphysema Centre, The Woolcock Institute of Medical Research, The University of Sydney, Glebe, Australia. <sup>2</sup>School of Life Sciences, Faculty of Science, University of Technology Sydney, Ultimo, Australia. <sup>3</sup>Dept of Thoracic Medicine, Concord Repatriation General Hospital, Concord, Australia. <sup>4</sup>Dept of Respiratory Medicine, Royal North Shore Hospital, St. Leonards, Australia. <sup>5</sup>NHMRC Centre of Excellence in Severe Asthma, New Lambton Heights, Australia. <sup>6</sup>Faculty of Medicine and Health Sciences, The University of Sydney, Sydney, Australia.

**Correspondence:** David G. Chapman, University of Technology Sydney, School of Life Sciences, 431 Glebe Point Road, Glebe, New South Wales 2037, Australia. E-mail: d.chapman@sydney.edu.au

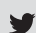

@ERSpublications

Reduced  $K_{CO}$  in discharged patients with COVID-19 suggests persistent abnormalities in gas exchange. Further research is required to understand why. <https://bit.ly/2Hb00gq>

**Cite this article as:** Chapman DG, Badal T, King GG, *et al.* Caution in interpretation of abnormal carbon monoxide diffusion capacity in COVID-19 patients. *Eur Respir J* 2021; 57: 2003263 [<https://doi.org/10.1183/13993003.03263-2020>].

This single-page version can be shared freely online.

Copyright ©ERS 2021. This version is distributed under the terms of the Creative Commons Attribution Non-Commercial Licence 4.0.

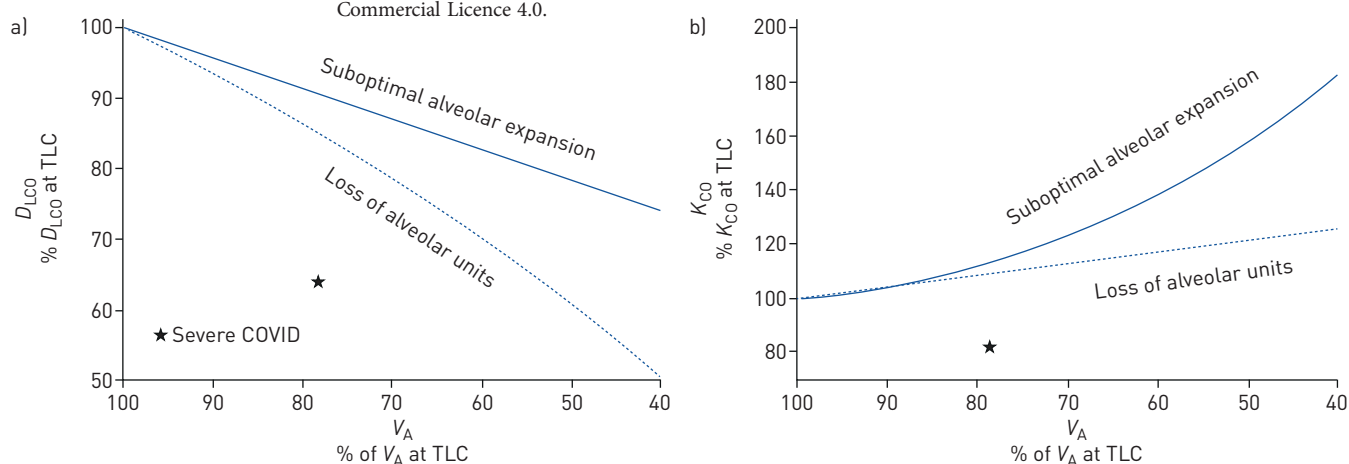

*To the Editor:*

We read with much interest the recent findings published in the *European Respiratory Journal* of reduced gas transfer in patients following coronavirus disease 2019 (COVID-19). Mo *et al.* [1] investigated conventional pulmonary function in survivors of mild, moderate and severe COVID-19 approximately 20–30 days after onset of symptoms. While patients had relatively normal spirometry, diffusing capacity of the lung for carbon monoxide ( $D_{LCO}$ ) was reduced in 50% and  $D_{LCO}$ /alveolar volume ( $V_A$ ) (or  $K_{CO}$ , to avoid misinterpretation) reduced in 25%. These findings are welcome as they provide significant insight into the long-term lung function impairment associated with COVID-19.
